# Supplementary material for: The safety of outpatient total shoulder arthroplasty: a systematic review and meta-analysis
Source: PubMed Central journal article supplement (PMC7892728; doi:10.1007/s00264-021-04940-7), 2021-01-23
Supplement: 264_2021_4940_MOESM2_ESM.pdf [file 264_2021_4940_MOESM2_ESM.pdf]

|       |                       | Risk of bias domains |    |    |    |    |    |    | Overall |
|-------|-----------------------|----------------------|----|----|----|----|----|----|---------|
|       |                       | D1                   | D2 | D3 | D4 | D5 | D6 | D7 |         |
| Study | Ode et al. 2020       | -                    | X  | +  | +  | +  | -  | +  | X       |
|       | Kramer et al. 2019    | -                    | X  | +  | +  | +  | -  | +  | X       |
|       | Erickson et al. 2019  | X                    | X  | +  | +  | +  | -  | +  | X       |
|       | Nelson et al. 2019    | !                    | !  | +  | +  | -  | X  | -  | !       |
|       | Arshi et al. 2018     | X                    | X  | +  | +  | -  | X  | -  | X       |
|       | Bean et al. 2018      | X                    | -  | +  | +  | -  | -  | +  | X       |
|       | Cancienne et al. 2017 | +                    | -  | +  | +  | +  | -  | +  | -       |
|       | Brolin et al. 2017    | +                    | +  | +  | +  | +  | -  | +  | -       |
|       | Basques et al. 2017   | X                    | X  | +  | +  | +  | -  | +  | X       |
|       | Leroux et al. 2016    | X                    | X  | +  | +  | +  | -  | +  | X       |

Domains:  
D1: Bias due to confounding.  
D2: Bias due to selection of participants.  
D3: Bias in classification of interventions.  
D4: Bias due to deviations from intended interventions.  
D5: Bias due to missing data.  
D6: Bias in measurement of outcomes.  
D7: Bias in selection of the reported result.

Judgement  
! Critical  
X Serious  
- Moderate  
+ Low
